# Supplementary material for: An Active Follow-up Strategy for Serological Suspects of Human African Trypanosomiasis with Negative Parasitology Set up by a Health Zone Team in the Democratic Republic of Congo
Source: PubMed Central journal article supplement (PMC7345707; doi:10.3390/tropicalmed5020053), 2020-04-04
Supplement: tropicalmed-05-00053-s001.pdf [file tropicalmed-05-00053-s001.pdf]

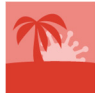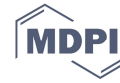

Supplementary Materials

# An Active Follow-up Strategy for Serological Suspects of Human African Trypanosomiasis with Negative Parasitology Set up by a Health Zone Team in the Democratic Republic of Congo

Matthieu Nkieri <sup>1, †</sup>, Florent Mbo <sup>2,3, †,\*</sup>, Papy Kavunga <sup>1</sup>, Pathou Nganzobo <sup>2</sup>, Titus Mafolo <sup>4</sup>, Chalet Selego <sup>4</sup> and Eric Mwamba Miaka <sup>2</sup>

<sup>1</sup> Bagata Health Zone, Avenue Kalanganda N 10, Mwendo Bagata, 32 Kwilu province, Democratic Republic of Congo; drmathieu.nkieri@gmail.com (M.N.); plukula@dndi.org (P.K.)

<sup>2</sup> National Sleeping Sickness Control Program (PNLTHA) (PNMLS building), Boulevard Triomphale crossing Av. 24 November, 10 Kinshasa, Democratic Republic of Congo; drnganzobo@yahoo.fr (P.N.); erickmwamb2002@yahoo.fr (E.M.M.)

<sup>3</sup> HAT Platform, Avenue Milambo N 4 Quartier Socimat, Gombe, 10 Kinshasa, Democratic Republic of Congo (F.M.)

<sup>4</sup> Provincial Health Ministry of Kwilu, Aviation/Ifuri/ Bandundu town, Democratic Republic of Congo; titusmafolutitu@gmail.com (T.M.); selegochalenda2005@yahoo.fr (C.S.)

† These authors contributed equally

\* Correspondence: fmbo@dndi.org; docflorentmbo@yahoo.fr; Tel.: +243814313838

Received: 6 January 2020; Accepted: 2 April 2020; Published: date

**Table S1.** Number of CATT positive serological suspects collected in Bagata Health Zone (HZ).

| Suspect Number | Sex | Age | HZ   | Previous Exam at HC | CATT | HAT Diagnosis at HC | Main Signs and Symptoms | Distance Location to Hospital | Arrival to Hospital | Follow-Up by Reactive Search |
|----------------|-----|-----|------|---------------------|------|---------------------|-------------------------|-------------------------------|---------------------|------------------------------|
| 1              | F   | 31  | BGTA | 01.09.2017          | pos  | neg.                | headache                | NA                            | no                  | NA                           |
| 2              | F   | 29  | BGTA | 28.10.2017          | pos  | neg.                | headache, dizziness     | NA                            | no                  | NA                           |
| 3              | M   | 11  | BGTA | 27.12.2017          | pos  | neg.                | headache, backpain      | NA                            | no                  | NA                           |
| 4              | F   | 41  | BGTA | 09.01.2017          | pos  | neg.                | headache                | 1                             | herself             | no                           |
| 5              | M   | 9   | BGTA | 24.01.2018          | pos  | neg.                | headache                | NA                            | no                  | NA                           |

|    |   |    |      |             |     |      |                 |     |           |     |
|----|---|----|------|-------------|-----|------|-----------------|-----|-----------|-----|
| 6  | F | 23 | BGTA | 04.01.2018  | pos | neg. | back pain       | 1   | herself   | no  |
| 7  | M | 47 | BGTA | 01.03.2017  | pos | neg. | pruritus        | NA  | no        | NA  |
| 8  | M | 28 | BGTA | 13.03.2017  | pos | neg. | nausea          | 1   | himself   | no  |
| 9  | F | 37 | BGTA | 30.04.2018  | pos | neg. | headache        | 1   | herself   | no  |
| 10 | F | 60 | BGTA | 25.12.2017  | pos | neg. | headache        | 1   | herself   | no  |
| 11 | F | 7  | BGTA | 31.01.2018  | pos | neg. | nausea          | NA  | no        | NA  |
| 12 | F | 32 | BGTA | 27.05.2018  | pos | neg. | pruritus        | 1   | Motorbike | yes |
| 13 | M | 13 | BGTA | 26.06.2018  | pos | neg. | pruritus        | 20  | Motorbike | yes |
| 14 | M | 19 | BGTA | 16.11.2017  | pos | neg. | fever           | NA  | no        | NA  |
| 15 | M | 65 | BGTA | 15.12.2017  | pos | neg. | anorexia        | 20  | Motorbike | yes |
| 16 | M | 15 | BGTA | 15.12.2017  | pos | neg. | headache        | 20  | Motorbike | yes |
| 17 | F | 57 | BGTA | 16.11.2017  | pos | neg. | sleepiness      | 20  | Motorbike | yes |
| 18 | M | 45 | BGTA | 10.013.2017 | pos | neg. | headache, fever | NA  | no        | NA  |
| 19 | M | 47 | BGTA | 15.04.2017  | pos | neg. | nausea          | 37  | Motorbike | yes |
| 20 | M | 68 | BGTA | 24.08.2018  | pos | neg. | nausea          | NA  | no        | NA  |
| 21 | M | 34 | BGTA | 24.08.2018  | pos | neg. | fever           | NA  | no        | NA  |
| 22 | F | 29 | BGTA | 24.08.2018  | pos | neg. | headache        | 68  | Motorbike | yes |
| 23 | M | 31 | BGTA | 24.08.2018  | pos | neg. | nausea          | 76  | Vehicle   | yes |
| 24 | F | 24 | BGTA | 26.06.2019  | pos | neg. | nausea          | 59  | Vehicle   | yes |
| 25 | M | 13 | BGTA | 20.09.2018  | pos | neg. | pruritus        | 10  | Motorbike | yes |
| 26 | F | 33 | BGTA | 09.07.2017  | pos | neg. | fever           | 17  | Motorbike | yes |
| 27 | M | 19 | BGTA | 07.09.2017  | pos | neg. | pruritus        | 10  | Motorbike | yes |
| 28 | F | 3  | BGTA | 07.09.2017  | pos | neg. | fever           | 17  | Motorbike | yes |
| 29 | M | 19 | BGTA | 07.09.2017  | pos | neg. | sleepiness      | 10  | himself   | no  |
| 30 | M | 19 | BGTA | 07.08.2017  | pos | neg. | sleepiness      | 10  | himself   | no  |
| 31 | F | 46 | BGTA | 20.12.2017  | pos | neg. | fever           | 120 | Vehicle   | yes |
| 32 | M | 56 | BGTA | 20.12.2017  | pos | neg. | headache        | NA  | no        | NA  |
| 33 | F | 25 | BGTA | 12.102018   | pos | neg. | nausea          | 122 | Vehicle   | yes |
| 34 | F | 23 | BGTA | 11.10.2018  | pos | neg. | sleepiness      | 84  | Vehicle   | yes |
| 35 | F | 20 | BGTA | 23.11.2017  | pos | neg. | nausea          | 84  | Vehicle   | yes |
| 36 | M | 5  | BGTA | 04.07.2019  | pos | neg. | fever           | NA  | no        | NA  |

|    |   |    |       |            |     |      |            |     |           |     |
|----|---|----|-------|------------|-----|------|------------|-----|-----------|-----|
| 37 | F | 5  | BGTA  | 04.07.2019 | pos | neg. | fever      | NA  | no        | NA  |
| 38 | F | 29 | BGTA  | 04.07.2019 | pos | neg. | pruritus   | NA  | no        | NA  |
| 39 | F | 54 | SIA   | 27.05.2018 | pos | neg. | anorexia   | NA  | no        | NA  |
| 40 | M | 26 | SIA   | 09.06.2018 | pos | neg. | headache   | NA  | no        | NA  |
| 41 | F | 15 | SIA   | 17.05.2019 | pos | neg. | pruritus   | NA  | no        | NA  |
| 42 | M | 25 | SIA   | 17.05.2019 | pos | neg. | anorexia   | NA  | no        | NA  |
| 43 | F | 10 | KKGO  | 30.03.2019 | pos | neg. | headache   | NA  | no        | NA  |
| 44 | M | 34 | DJUMA | 04.02.2019 | pos | neg. | pruritus   | NA  | no        | NA  |
| 45 | M | 33 | BGTA  | 04.09.2017 | pos | neg. | anorexia   | 90  | Motorbike | yes |
| 46 | F | 24 | BGTA  | 9.09.2017  | pos | neg. | Fever      | 90  | Motorbike | yes |
| 47 | F | 26 | BGTA  | 23.09.2017 | pos | neg. | Nausea     | NA  | no        | NA  |
| 48 | F | 44 | BGTA  | 27.09.2017 | pos | neg. | insomnia   | NA  | no        | NA  |
| 49 | F | 36 | BGTA  | 04.11.2017 | pos | neg. | insomnia   | 90  | Motorbike | yes |
| 50 | F | 7  | BGTA  | 04.11.2017 | pos | neg. | sleepiness | NA  | no        | NA  |
| 51 | M | 43 | BGTA  | 11.12.2017 | pos | neg. | headache   | NA  | no        | NA  |
| 52 | M | 10 | BGTA  | 05.01.2018 | pos | neg. | fever      | NA  | no        | NA  |
| 53 | M | 34 | BGTA  | 10.01.2018 | pos | neg. | insomnia   | NA  | no        | NA  |
| 54 | F | 41 | BGTA  | 03.02.2018 | pos | neg. | fever      | NA  | no        | NA  |
| 55 | M | 46 | BGTA  | 09.12.2018 | pos | neg. | pruritus   | 104 | Vehicle   | yes |
| 56 | M | 39 | BGTA  | 04.07.2018 | pos | neg. | headache   | 87  | Vehicle   | yes |
| 57 | M | 41 | BGTA  | 07.07.2018 | pos | neg. | nausea     | 96  | Vehicle   | yes |
| 58 | M | 21 | BGTA  | 12.08.2018 | pos | neg. | headache   | NA  | no        | NA  |
| 59 | F | 6  | BGTA  | 19.08.2018 | pos | neg. | fever      | NA  | no        | NA  |
| 60 | F | 24 | BGTA  | 19.08.2018 | pos | neg. | nausea     | NA  | no        | NA  |
| 61 | F | 30 | BGTA  | 19.09.2017 | pos | neg. | fever      | 67  | Motorbike | yes |
| 62 | M | 42 | BGTA  | 10.02.2018 | pos | neg. | anorexia   | 20  | Motorbike | yes |
| 63 | F | 54 | BGTA  | 17.02.2018 | pos | neg. | fever      | 20  | Motorbike | yes |
| 64 | M | 28 | BGTA  | 25.02.2018 | pos | neg. | nausea     | NA  | no        | NA  |
| 65 | F | 34 | BGTA  | 25.02.2018 | pos | neg. | fever      | NA  | no        | NA  |
| 66 | F | 31 | BGTA  | 04.03.2018 | pos | neg. | headache   | NA  | no        | NA  |
| 67 | F | 16 | BGTA  | 23.05.2018 | pos | neg. | anorexia   | NA  | no        | NA  |

|    |   |    |      |            |     |      |          |    |           |     |
|----|---|----|------|------------|-----|------|----------|----|-----------|-----|
| 68 | F | 59 | BGTA | 04.06.2018 | pos | neg. | fever    | 36 | Motorbike | yes |
| 69 | F | 40 | BGTA | 02.12.2017 | pos | neg. | pruritus | NA | no        | NA  |
| 70 | F | 32 | BGTA | 08.01.2018 | pos | neg. | anorexia | NA | no        | NA  |
| 71 | F | 21 | BGTA | 03.04.2018 | pos | neg. | fever    | 59 | Vehicle   | yes |
| 72 | M | 31 | BGTA | 15.03.2018 | pos | neg. | anorexia | 64 | Vehicle   | yes |
| 73 | M | 38 | BGTA | 09.08.2018 | pos | neg. | nausea   | NA | no        | NA  |
| 74 | F | 22 | BGTA | 21.08.2018 | pos | neg. | asthenia | NA | no        | NA  |

**Table S2.** Signs and test results of 36 CATT positive serological suspects at previous exam at health centers and at the follow-up visits at the hospital.

| Suspect Number | Sex | Age | Initial Test at HC | CATT | Signs      | Follow up 1 | HAT  |                       |                    | Follow up 2 | HAT  |                       |          |
|----------------|-----|-----|--------------------|------|------------|-------------|------|-----------------------|--------------------|-------------|------|-----------------------|----------|
|                |     |     |                    |      |            |             | CATT | Diagnosis at Hospital | Signs              |             | CATT | Diagnosis at Hospital | Signs    |
| 1              | F   | 41  | 09.01.2017         | pos  | headache   | 24.04.2019  | neg  | neg                   | headache           | no          |      |                       |          |
| 2              | F   | 23  | 04.01.2018         | pos  | back pain  | 24.04.2018  | pos  | neg                   | back pain          | no          |      |                       |          |
| 3              | M   | 28  | 13.03.2017         | pos  | nausea     | 13.06.2017  | pos  | neg                   | nausea             | no          |      |                       |          |
| 4              | F   | 37  | 30.04.2018         | pos  | headache   | 30.08.2018  | pos  | neg                   | nausea             | no          |      |                       |          |
| 5              | F   | 60  | 25.12.2017         | pos  | headache   | 25.03.2018  | pos  | pos                   | dizziness          | no          |      |                       |          |
| 6              | F   | 32  | 27.05.2018         | pos  | pruritus   | 27.08.2018  | neg  | neg                   | nausea             | no          |      |                       |          |
| 7              | M   | 13  | 26.06.2018         | pos  | pruritus   | 12.09.2018  | pos  | pos                   | fever              | no          |      |                       |          |
| 8              | M   | 65  | 15.12.2017         | pos  | anorexia   | 21.03.2018  | pos  | pos                   | nausea             | no          |      |                       |          |
| 9              | M   | 15  | 15.12.2017         | pos  | headache   | 21.03.2018  | pos  | pos                   | diarrhea           | no          |      |                       |          |
| 10             | F   | 57  | 16.11.2017         | pos  | sleepiness | 16.02.2018  | pos  | neg                   | nausea             | no          |      |                       |          |
| 11             | M   | 47  | 15.04.2017         | pos  | nausea     | 15.07.2017  | pos  | neg                   | nausea             | no          |      |                       |          |
| 12             | F   | 29  | 24.08.2018         | pos  | headache   | 24.11.2018  | pos  | neg                   | back pain          | no          |      |                       |          |
| 13             | M   | 31  | 24.08.2018         | pos  | nausea     | 24.11.2018  | pos  | neg                   | diarrhea           | 24.03.2019  | pos  | pos                   | headache |
| 14             | F   | 24  | 26.06.2019         | pos  | nausea     | 28.09.2019  | neg  | neg                   | headache           | no          |      |                       |          |
| 15             | M   | 13  | 20.09.2018         | pos  | pruritus   | 20.12.2018  | pos  | pos                   | pruritus, headache | no          |      |                       |          |
| 16             | F   | 33  | 09.07.2017         | pos  | fever      | 07.12.2017  | pos  | neg                   | nausea             | no          |      |                       |          |
| 17             | M   | 19  | 07.09.2017         | pos  | pruritus   | 07.12.2017  | neg  | neg                   | nausea             | 12.03.2019  | pos  | pos                   | fever    |
| 18             | F   | 3   | 07.09.2017         | pos  | fever      | 07.12.2017  | neg  | neg                   | fever              | no          |      |                       |          |
| 19             | M   | 19  | 07.09.2017         | pos  | sleepiness | 07.12.2018  | pos  | neg                   | fever              | no          |      |                       |          |

|    |   |    |            |     |            |            |     |     |                      |    |
|----|---|----|------------|-----|------------|------------|-----|-----|----------------------|----|
| 20 | M | 19 | 07.08.2017 | pos | sleepiness | 16.11.2017 | pos | pos | sleepiness           | no |
| 21 | F | 46 | 20.12.2017 | pos | fever      | 20.03.2018 | neg | neg | fever                | no |
| 22 | F | 23 | 11.10.2018 | pos | sleepiness | 11.02.2019 | neg | pos | sleepiness, pruritus | no |
| 23 | F | 20 | 23.11.2017 | pos | nausea     | 28.02.2018 | pos | neg | fever                | no |
| 24 | M | 33 | 04.09.2017 | pos | anorexia   | 12.12.2018 | pos | neg | nausea               | no |
| 25 | F | 24 | 09.09.2017 | pos | fever      | 10.12.2017 | neg | neg | fever                | no |
| 26 | F | 36 | 04.11.2017 | pos | insomnia   | 06.02.2018 | pos | neg | sleepiness           | no |
| 27 | M | 46 | 09.12.2018 | pos | pruritus   | 12.05.2019 | pos | pos | pruritus, fever      | no |
| 28 | M | 39 | 04.07.2018 | pos | headache   | 06.10.2018 | pos | neg | fever                | no |
| 29 | M | 41 | 07.07.2018 | pos | nausea     | 08.10.2018 | neg | neg | pruritus             | no |
| 30 | F | 30 | 19.09.2017 | pos | fever      | 19.12.2017 | pos | pos | fever                | no |
| 31 | M | 42 | 10.02.2018 | pos | anorexia   | 12.05.2019 | neg | neg | pruritus             | no |
| 32 | F | 54 | 17.02.2018 | pos | fever      | 22.03.2019 | pos | pos | anorexia             | no |
| 33 | F | 25 | 25.02.2018 | pos | nausea     | 26.05.2018 | neg | neg | headache             | no |
| 34 | F | 59 | 04.06.2018 | pos | fever      | 06.09.2019 | pos | pos | anorexia, fever      | no |
| 35 | F | 21 | 03.04.2018 | pos | fever      | 04.07.2018 | pos | neg | pruritus             | no |
| 36 | M | 31 | 15.03.2018 | pos | anorexia   | 15.06.2018 | pos | pos | insomnia             | no |
